# Supplementary material
Source: publisher figshare collection journal article supplement (https://acs.figshare.com/ndownloader/files/10186860)
Supplement: Supplementary file 1 [file 10186860]

## Supporting information

### Electron-hopping brings lattice strain and high catalytic activity in low temperature oxidative coupling of methane in an electric field

Shuheï Ogo<sup>\*,†‡</sup>, Hideaki Nakatsubo<sup>†</sup>, Kousei Iwasaki<sup>†</sup>, Ayaka Sato<sup>†</sup>, Kota Murakami<sup>†</sup>,  
Tomohiro Yabe<sup>†</sup>, Atsushi Ishikawa<sup>‡§¶</sup>, Hiromi Nakai<sup>§</sup>, and Yasushi Sekine<sup>†</sup>

<sup>†</sup> *Department of Applied Chemistry, Waseda University, 3-4-1, Okubo, Shinjuku, Tokyo, 169-8555  
Japan*

<sup>‡</sup> *PRESTO, Japan Science and Technology Agency (JST), 4-1-8 Honcho, Kawaguchi, Saitama  
332-0012, Japan*

<sup>§</sup> *Department of Chemistry and Biochemistry, Waseda University, 3-4-1, Okubo, Shinjuku, Tokyo,  
169-8555 Japan*

<sup>¶</sup> *Center for Green Research on Energy and Environmental Materials, National Institute of  
Materials Science, 1-1, Namiki, Tsukuba, Ibaraki, 305-0044 Japan*

\*: Corresponding author: ogo@aoni.waseda.jp

### ***Preparation of $Ce_2(WO_4)_3$***

$Ce_2(WO_4)_3$  was prepared using an EDTA-citrate complex polymerization method, as described in previous papers.<sup>1,2</sup> Firstly, EDTA (Ethylenediaminetetraacetic acid; Kanto Chemical Co., Inc.) was dissolved in aqueous ammonia (28.0–30.0%; Kanto Chemical Co., Inc.), and then an aqueous solution of  $Ce(NO_3)_3 \cdot 6H_2O$  (Kanto Chemical Co., Inc.) was added. Subsequently,  $WO_3$  (Kanto Chemical Co., Inc.) was added to the solution. After 15 min of stirring at 313 K, citric acid (Kanto Chemical Co., Inc.) was added; the pH of the solution was adjusted to 10 using the aqueous ammonia with a temperature fixed to 353 K. The prepared solution was stirred at 353 K until formation of gel-like precipitate. This gel-like precipitate was pre-calcined for 3 h in a muffle furnace at 503 K under a ramping rate of 5 K min<sup>-1</sup> to obtain powder primer. This Powder primer was calcined for 5 h in the muffle furnace at 1273 K under a ramping rate of 5 K min<sup>-1</sup> to obtain well-crystalized  $Ce_2(WO_4)_3$ . The molar ratio of EDTA, citric acid, and total metal ions (Ce+W) was 1:1.5:1.

### ***Preparations of $Ln_2(WO_4)_3$***

$Ln_2(WO_4)_3$  (Ln = La, Pr, Nd, Sm, Eu, Gd, Tb, Dy) catalysts were prepared according to the published procedure.<sup>3</sup> Stoichiometric amounts (Ln:W = 2:3) of  $Ln(NO_3)_3 \cdot 6H_2O$  (Kanto Chemical Co., Inc.) and ammonium metatungstate hydrate ( $(NH_4)_6H_2W_{12}O_{40} \cdot nH_2O$ , STREM CHEMICALS) were dissolved in distilled water, and then stirred at 353 K until formation of gel-like precipitate. The prepared gel-like precipitate was calcined for 12 h in the muffle furnace at 1173 K under a ramping rate of 10 K min<sup>-1</sup>. The calcined sample was ground with an agate mortar at room temperature, followed by another 12 h of calcination at 1173 K to obtain well-crystalized  $Ln_2(WO_4)_3$ .

### ***Preparation of $Ce_2(WO_4)_3/CeO_2$***

$\text{Ce}_2(\text{WO}_4)_3/\text{CeO}_2$  catalyst containing 11.9 wt% W was prepared using an impregnation method with water as the solvent, as described in earlier reports.<sup>4,5</sup> An ammonium metatungstate hydrate  $((\text{NH}_4)_6\text{H}_2\text{W}_{12}\text{O}_{40}\cdot\text{H}_2\text{O})$  was used as a precursor. After impregnation, the resulting suspension was evaporated. Then the resulting solid was dried at 393 K overnight, followed by calcination for 3 h in air at 1173 K under a ramping rate of  $0.5 \text{ K min}^{-1}$ .

**Table S1.** Oxidative coupling of methane over  $\text{La}_2(\text{WO}_4)_3$  catalyst in the electric field with various imposed currents and voltages <sup>a</sup>

| Current<br>/ mA | Voltage<br>/ V | $T_{\text{tc}}$ <sup>b</sup><br>/ K | Conv. / %     |              | $\text{C}_2$ Sel.<br>/ % | CO Sel.<br>/ % | $\text{CO}_2$ Sel.<br>/ % |
|-----------------|----------------|-------------------------------------|---------------|--------------|--------------------------|----------------|---------------------------|
|                 |                |                                     | $\text{CH}_4$ | $\text{O}_2$ |                          |                |                           |
| 1.5             | 700            | 514                                 | 0.01          | 0.7          | 0.0                      | 100            | 0.0                       |
| 3.0             | 400            | 525                                 | 0.02          | 0.3          | 0.0                      | 100            | 0.0                       |
| 5.0             | 200            | 545                                 | 0.01          | 0.5          | 0.0                      | 100            | 0.0                       |
| 7.0             | 200            | 567                                 | 0.01          | 1.2          | 0.0                      | 100            | 0.0                       |

<sup>a</sup>  $\text{CH}_4:\text{O}_2:\text{Ar} = 25:15:60$ , total flow rate of 100 SCCM; current, 1.5-7.0 mA; catalyst weight, 100 mg; furnace temperature, 423 K.

<sup>b</sup> Catalyst bed temperature measured using a thermocouple.

**Table S2.** BET surface area of various catalysts as made and after reaction with electric field

| Catalyst                     | BET surface area / $\text{m}^2 \text{ g}^{-1}$ |                |
|------------------------------|------------------------------------------------|----------------|
|                              | As-made                                        | After reaction |
| $\text{La}_2(\text{WO}_4)_3$ | 1.3                                            | 0.4            |
| $\text{Ce}_2(\text{WO}_4)_3$ | 1.0                                            | 0.7            |

**Table S3.** Lattice parameter and band gap of Ce<sub>2</sub>(WO<sub>4</sub>)<sub>3</sub>

|                     | <i>U</i> term               |                                 | lattice parameter |             |             |                     | Band gap<br>/ eV |
|---------------------|-----------------------------|---------------------------------|-------------------|-------------|-------------|---------------------|------------------|
|                     | orbital                     | <i>U</i> <sub>eff</sub><br>/ eV | a<br>/ Ang.       | b<br>/ Ang. | c<br>/ Ang. | $\beta$<br>/ degree |                  |
| Exp. <sup>6,7</sup> | -                           | -                               | 7.81              | 11.7        | 11.6        | 109.4               | 1.64-2.05        |
| Calc.               | Ce 4 <i>f</i> <sup>a)</sup> | 0.0                             | 7.92              | 11.9        | 11.6        | 109.2               | -                |
|                     |                             | 1.0                             | 7.95              | 11.9        | 11.7        | 109.4               | 0.78             |
|                     |                             | 2.0                             | 7.96              | 11.9        | 11.7        | 109.4               | 1.37             |
|                     |                             | 3.0                             | 7.97              | 12.0        | 11.7        | 109.4               | 1.53             |
|                     |                             | 3.5                             | 7.96              | 12.0        | 11.8        | 109.7               | 1.82             |
|                     |                             | 4.0                             | 7.97              | 12.0        | 11.7        | 109.3               | 2.49             |
|                     |                             | 4.5                             | 7.99              | 12.0        | 11.7        | 109.1               | 2.68             |
|                     |                             | 5.0                             | 7.98              | 12.0        | 11.8        | 109.6               | (2.89)           |
|                     | W 5 <i>d</i> <sup>b)</sup>  | 1.0                             | 7.98              | 12.0        | 11.8        | 109.8               | 1.87             |
|                     |                             | 2.0                             | 7.99              | 12.0        | 11.7        | 109.5               | 1.95             |

a) *U*<sub>eff</sub> to W 5*d* = 0 eV.b) *U*<sub>eff</sub> to Ce 4*f* = 3.5 eV.**Table S4.** Lattice parameter and band gap of La<sub>2</sub>(WO<sub>4</sub>)<sub>3</sub>

|                   | <i>U</i> term |                                 | lattice parameter |             |             |                     | Band gap<br>/ eV |
|-------------------|---------------|---------------------------------|-------------------|-------------|-------------|---------------------|------------------|
|                   | orbital       | <i>U</i> <sub>eff</sub><br>/ eV | a<br>/ Ang.       | b<br>/ Ang. | c<br>/ Ang. | $\beta$<br>/ degree |                  |
| Exp. <sup>8</sup> | -             | -                               | 7.87              | 11.8        | 11.7        | 110.1               | -                |
| Calc.             | La 4 <i>f</i> | 0.0                             | 8.00              | 12.0        | 11.8        | 110.2               | 3.67             |
|                   |               | 2.0                             | 8.01              | 12.0        | 11.8        | 110.1               | 3.67             |
|                   |               | 4.0                             | 8.02              | 12.1        | 11.9        | 110.3               | 3.66             |
|                   |               | 6.0                             | 8.03              | 12.1        | 11.9        | 110.2               | 3.66             |

*U*<sub>eff</sub> to W 5*d* = 0 eV.

**Table S5.** Effects of charging on various W-O bond lengths and Ce-O bond lengths in the simulated cluster model of (130) facets of  $\text{Ce}_2(\text{WO}_4)_3$  structure

|      | Bond length / Å |      |
|------|-----------------|------|
|      | Neutral         | +1   |
| Ce-O | 2.54            | 2.50 |
|      | 2.23            | 2.18 |
|      | 2.37            | 2.34 |
|      | 2.45            | 2.45 |
| W-O  | 1.78            | 1.79 |
|      | 1.85            | 1.86 |
|      | 1.85            | 1.86 |
|      | 1.86            | 1.89 |

**Table S6.** Results of Bader charge analyses

|    | neutral | +8 adiabatic | $\Delta$ |
|----|---------|--------------|----------|
| Ce | 2.25    | 2.61         | 0.36     |
| W1 | 4.34    | 4.37         | 0.03     |
| W2 | 4.41    | 4.45         | 0.04     |
| O1 | -1.48   | -1.39        | 0.09     |
| O2 | -1.45   | -1.36        | 0.09     |
| O3 | -1.48   | -1.34        | 0.14     |
| O4 | -1.47   | -1.37        | 0.10     |
| O5 | -1.44   | -1.36        | 0.07     |
| O6 | -1.51   | -1.42        | 0.08     |

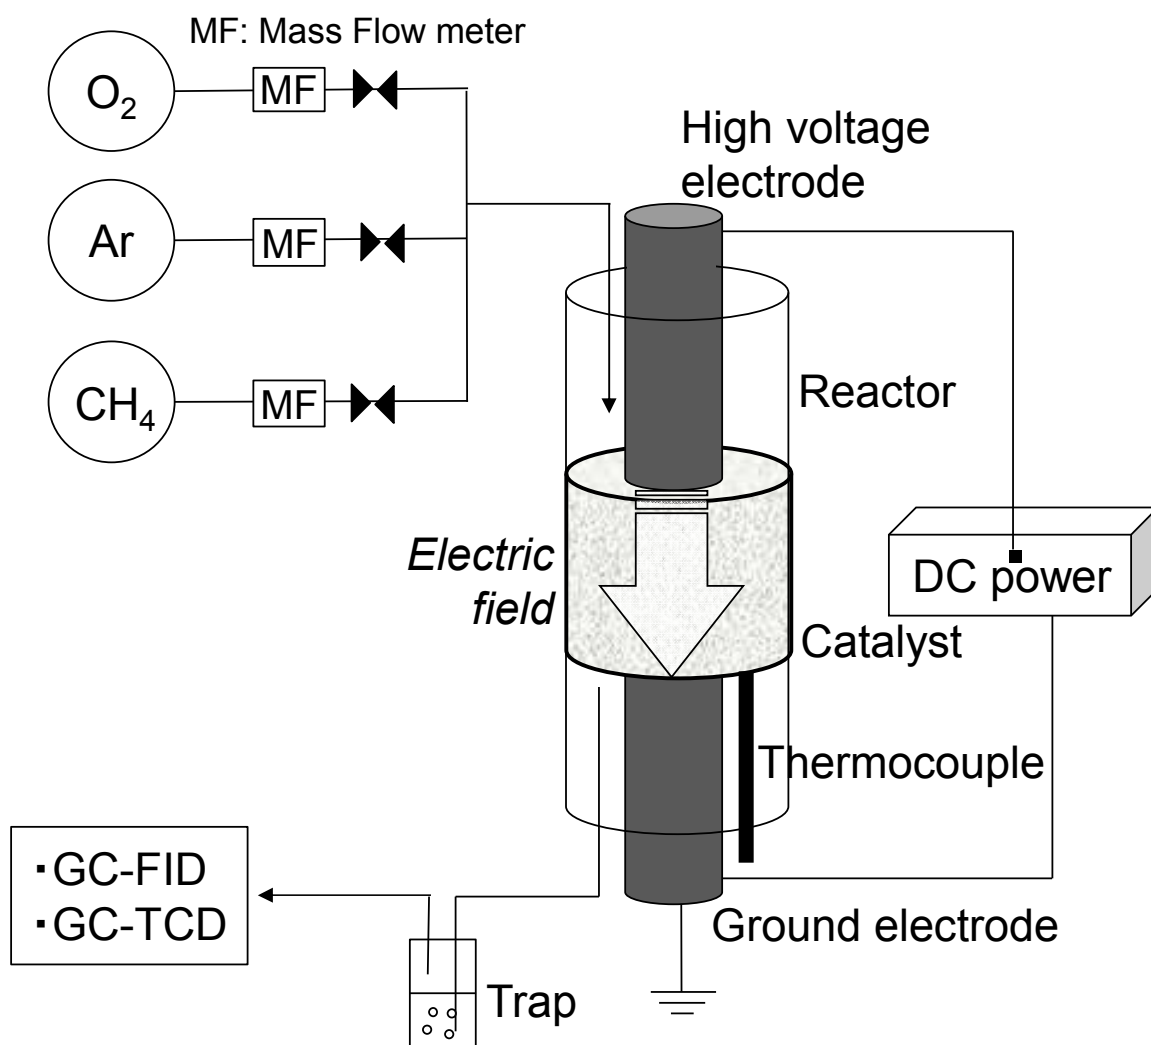

**Figure S1.** Schematic diagram of reactor for activity test.

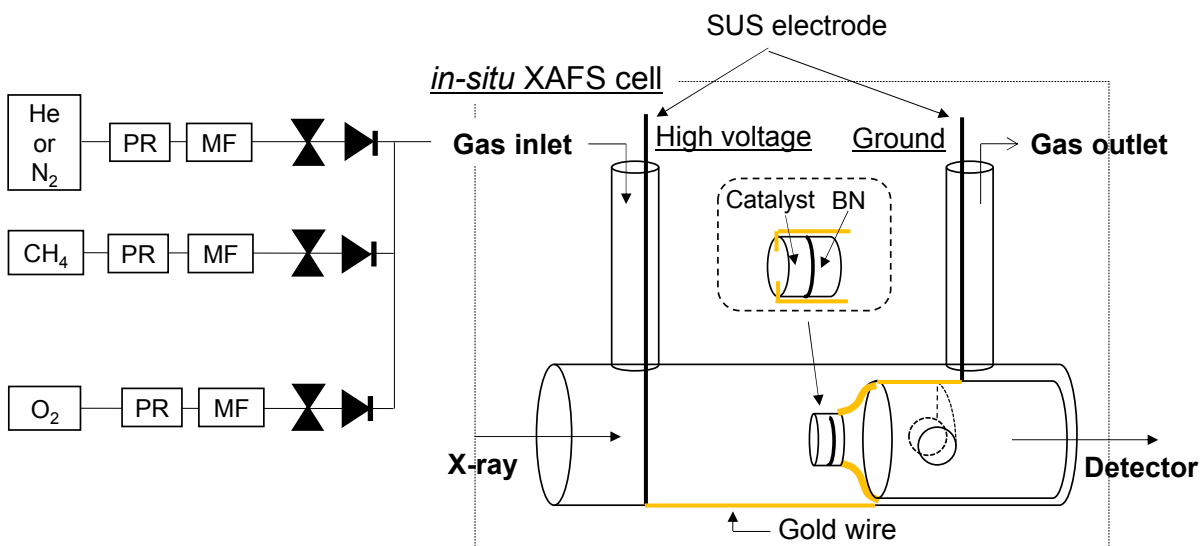

**Figure S2.** Schematic diagram of reactor for *in-situ* XAFS.



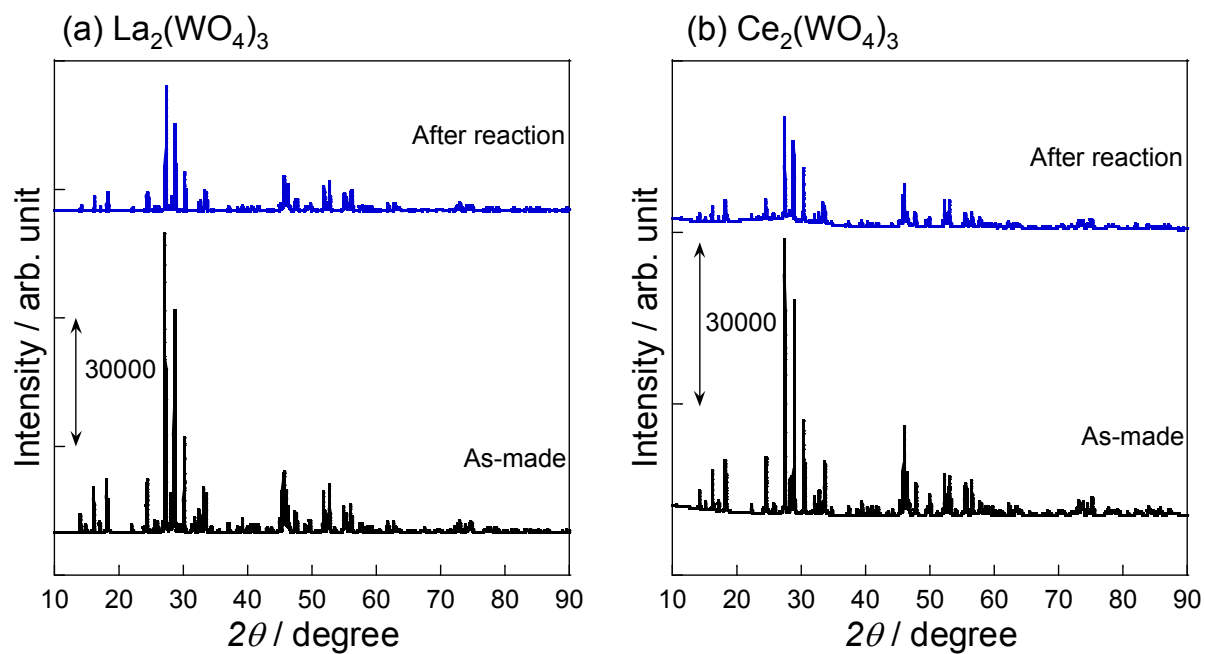

**Figure S3.** XRD patterns of (a)  $\text{La}_2(\text{WO}_4)_3$  and (b)  $\text{Ce}_2(\text{WO}_4)_3$  catalysts before and after used for oxidative coupling of methane in the electric field.

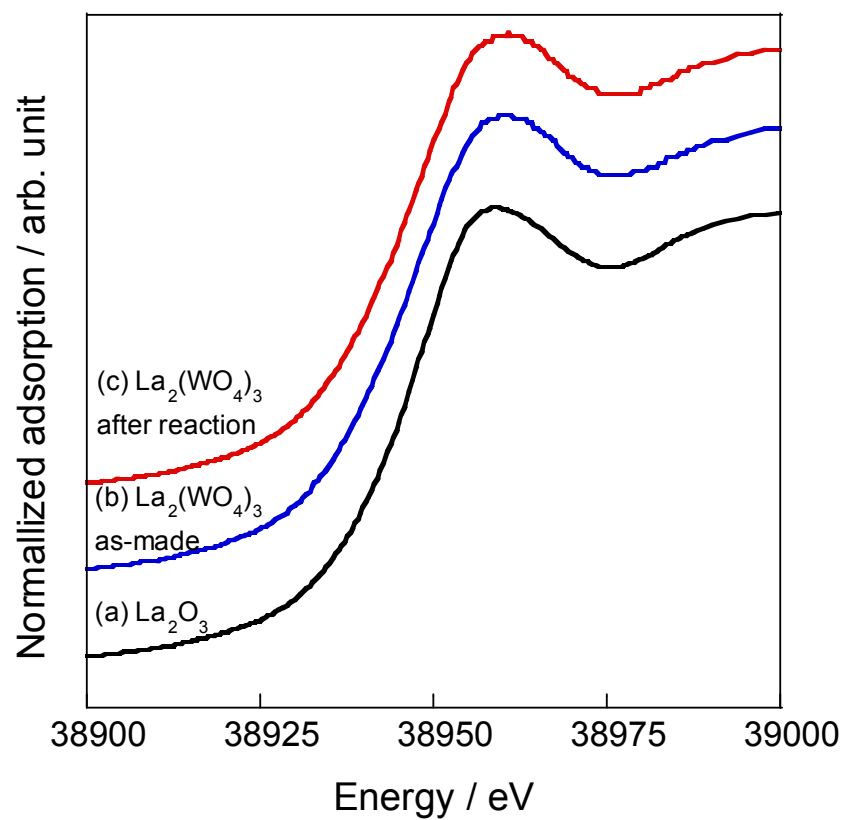

**Figure S4.** *Ex-situ* La K-edge XANES spectra of (a)  $\text{La}_2\text{O}_3$ , (b)  $\text{La}_2(\text{WO}_4)_3$  as-made, and (c)  $\text{La}_2(\text{WO}_4)_3$  after reaction with the electric field.

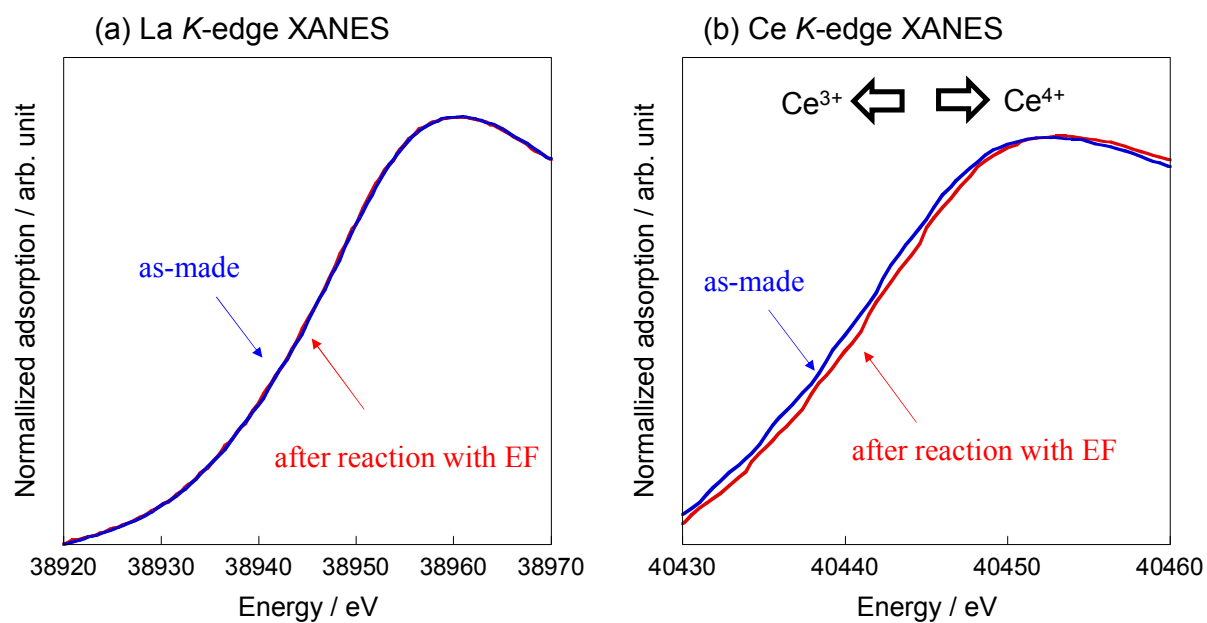

**Figure S5.** *Ex situ* (a) La *K*-edge and (b) Ce *K*-edge XANES spectra of  $\text{La}_2(\text{WO}_4)_3$  and  $\text{Ce}_2(\text{WO}_4)_3$ : (blue line) as-made, (red line) after reaction with EF.

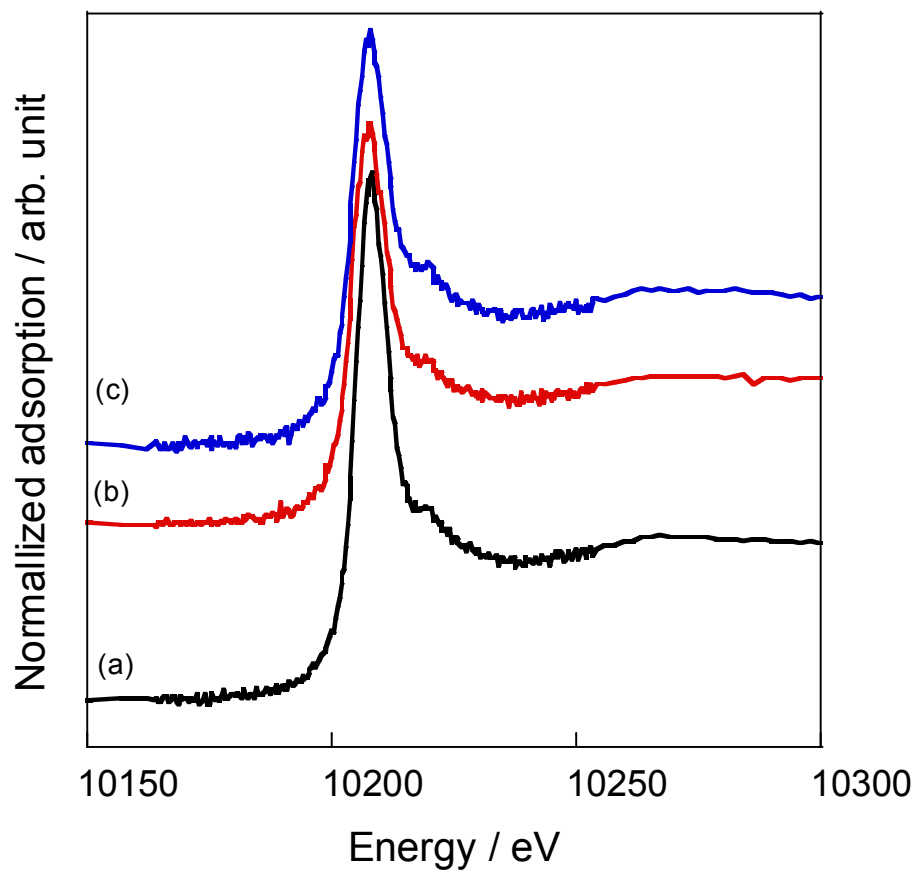

**Figure S6.** *In-situ* W  $L_3$ -edge XANES spectra of  $\text{Ce}_2(\text{WO}_4)_3/\text{CeO}_2$  during OCM reaction at 423 K: (a) without EF in  $\text{CH}_4 + \text{O}_2$  flow, (b) with EF (10 mA, 660 V) in  $\text{CH}_4 + \text{O}_2$  flow, (c) without EF after (b).

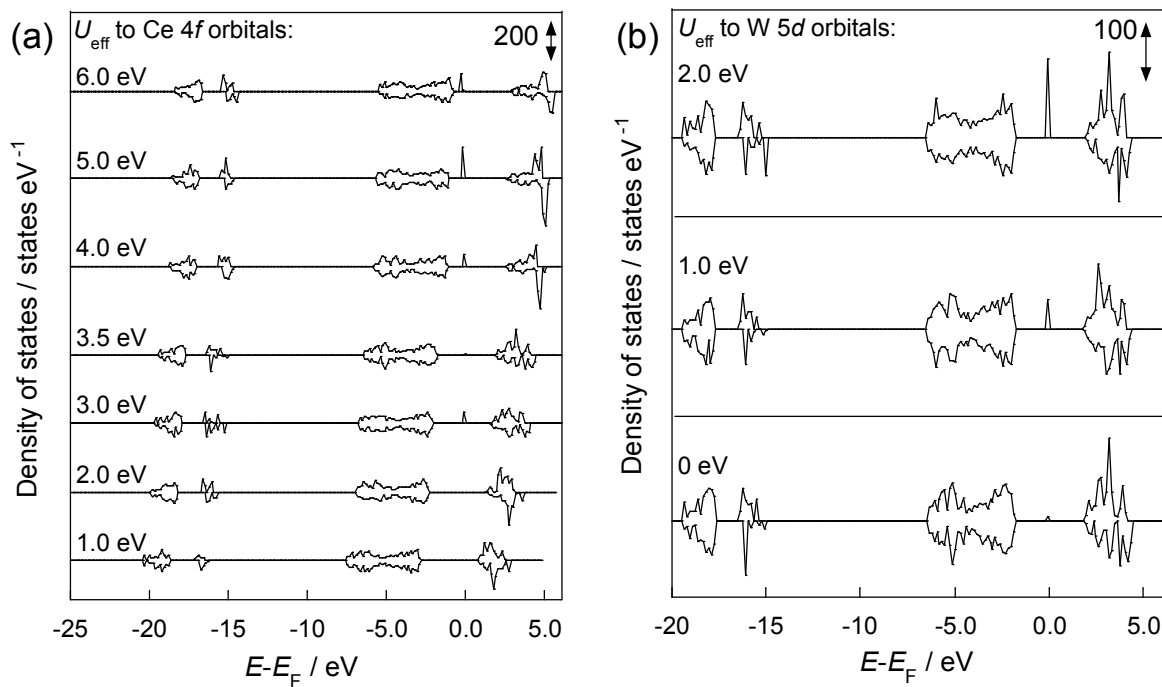

**Figure S7.** Calculated density of states for  $\text{Ce}_2(\text{WO}_4)_3$ : (a) adopting  $U_{\text{eff}}$  only to Ce 4f orbitals (W 5d is not adopted  $U_{\text{eff}}$ ), (b) with different  $U_{\text{eff}}$  to W 5d orbitals ( $U_{\text{eff}} = 3.5$  eV to Ce 4f orbitals is adopted).

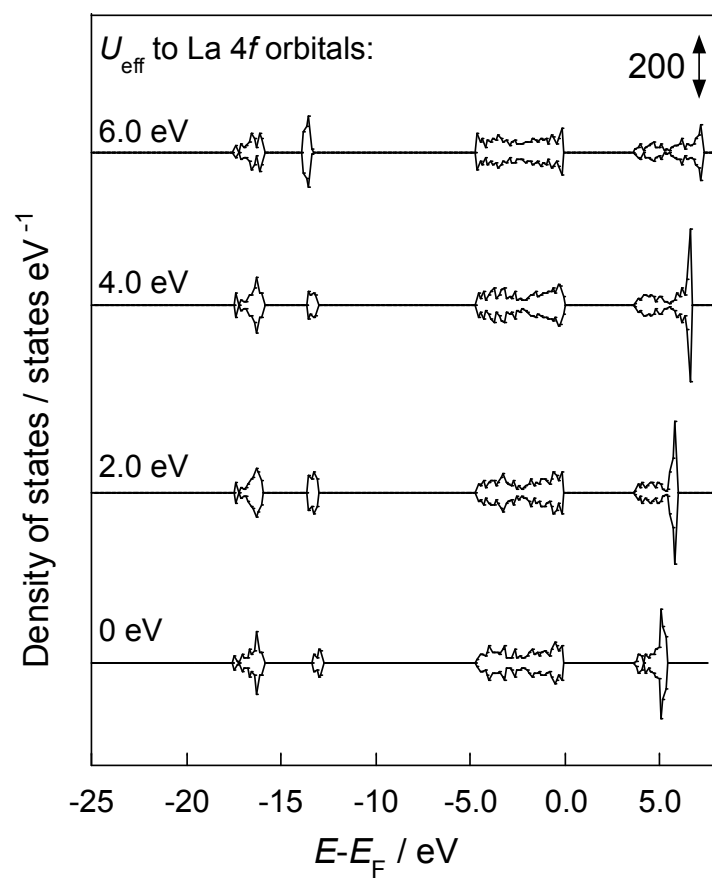

**Figure S8.** Calculated density of states for  $\text{La}_2(\text{WO}_4)_3$ : adopting  $U_{\text{eff}}$  only to La 4f orbitals (W 5d is not adopted  $U_{\text{eff}}$ ).

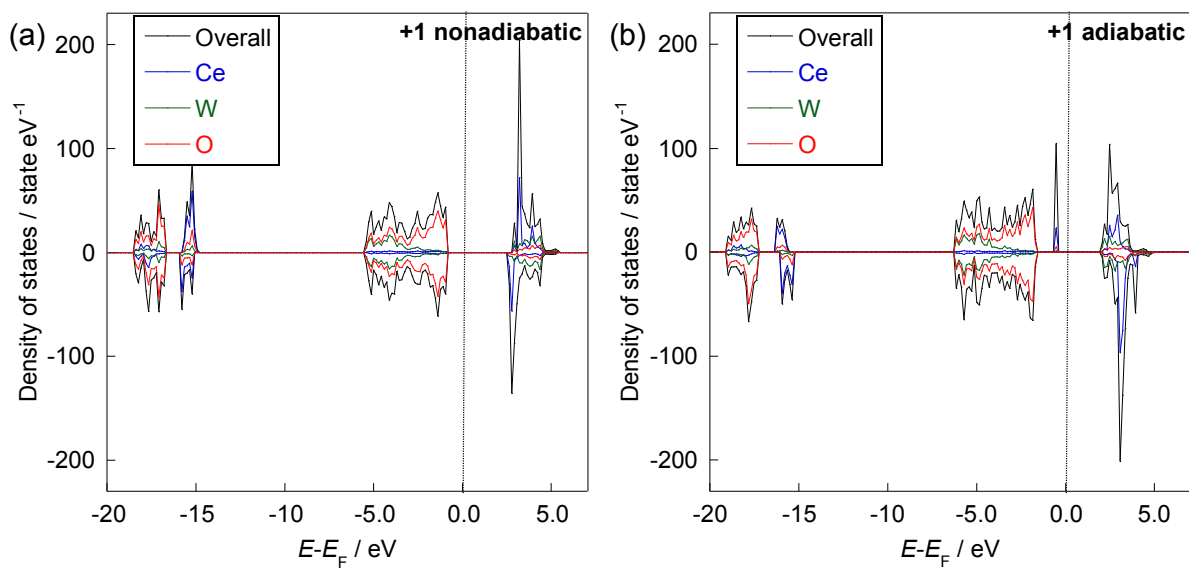

**Figure S9.** Calculated density of states for  $\text{Ce}_2(\text{WO}_4)_3$  with +1 charged system: (a) without optimization (nonadiabatic) and (b) with optimization (adiabatic).

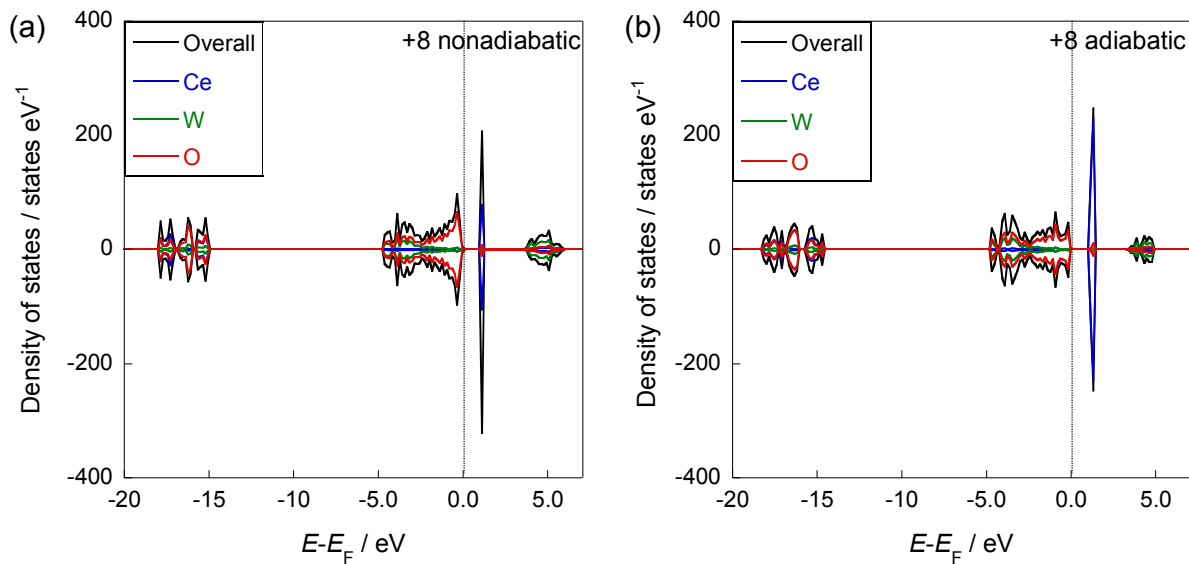

**Figure S10.** Calculated density of states for  $\text{Ce}_2(\text{WO}_4)_3$  with +8 charged system: (a) without optimization (nonadiabatic) and (b) with optimization (adiabatic).



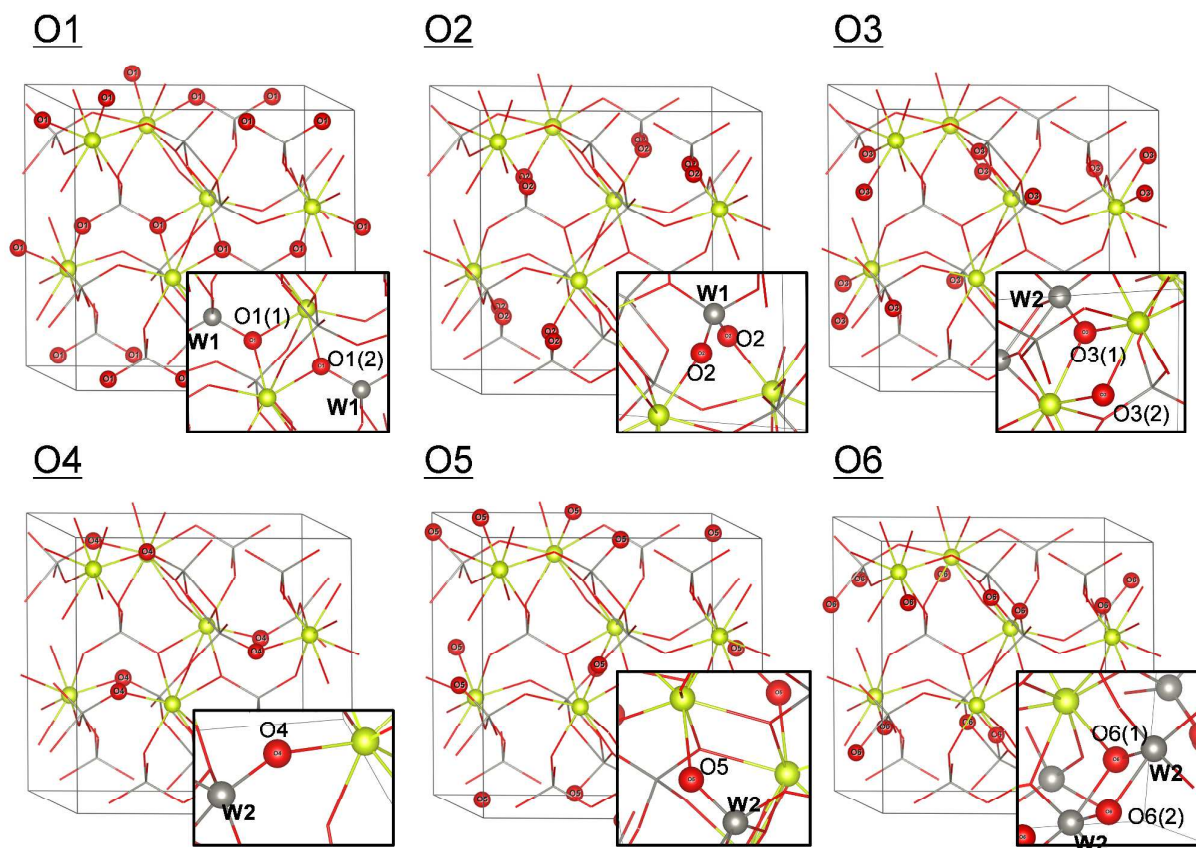

**Figure S11.** Six kinds of oxygens with different configuration in  $\text{Ln}_2(\text{WO}_4)_3$ : (Yellow) Ce or La, (Grey) W, (Red) O.

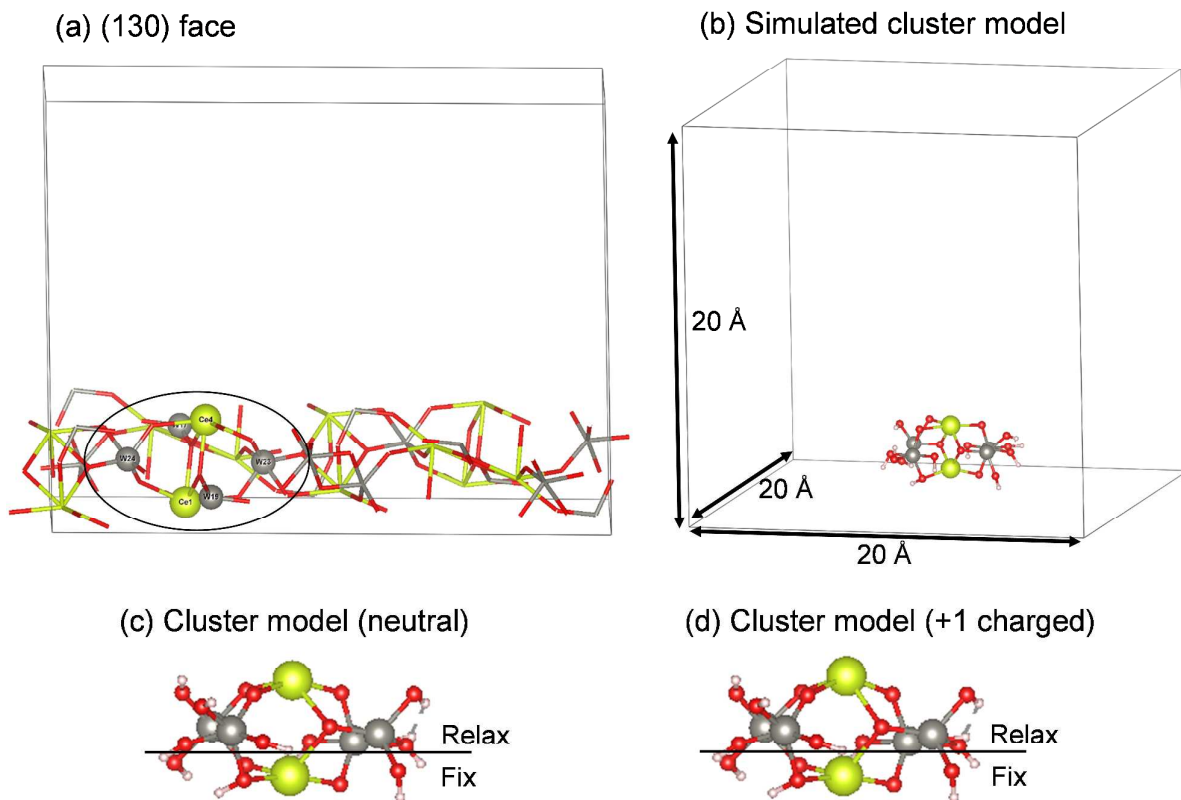

**Figure S12.** The structure model of  $\text{Ce}_2(\text{WO}_4)_3$ : (a) (130) face, (b) simulated cluster model, (c) enlarged cluster model without the electric field (neutral), (d) enlarged cluster model with the electric field (+1 charged). Black circle in (a) were used for simulation of the cluster model.

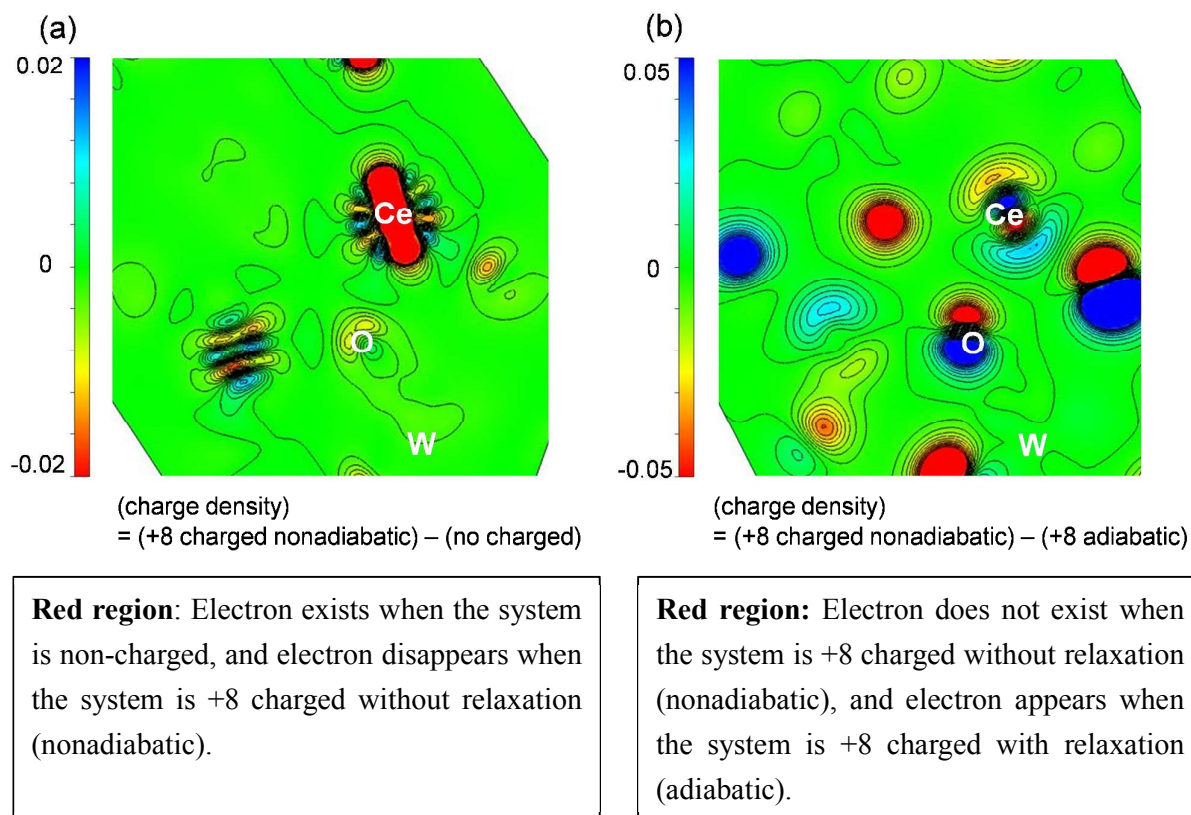

**Figure S13.** Charge density difference plots of  $\text{Ce}_2(\text{WO}_4)_3$  around O1(1): (a) (+8 charged without structural relaxation) – (neutral), (b) (+8 charged without structural relaxation) – (+8 with structural relaxation).

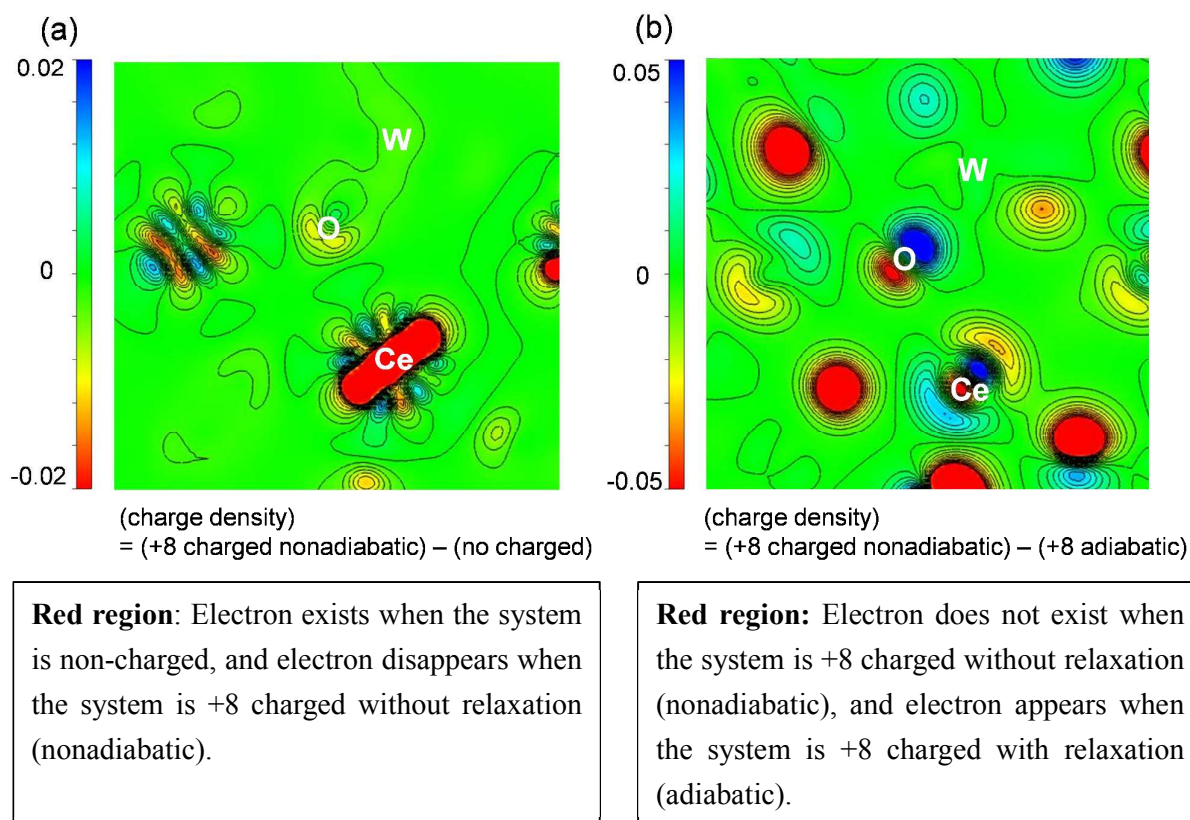

**Figure S14.** Charge density difference plots of  $\text{Ce}_2(\text{WO}_4)_3$  around O1(2): (a) (+8 charged without structural relaxation) – (neutral), (b) (+8 charged without structural relaxation) – (+8 with structural relaxation).

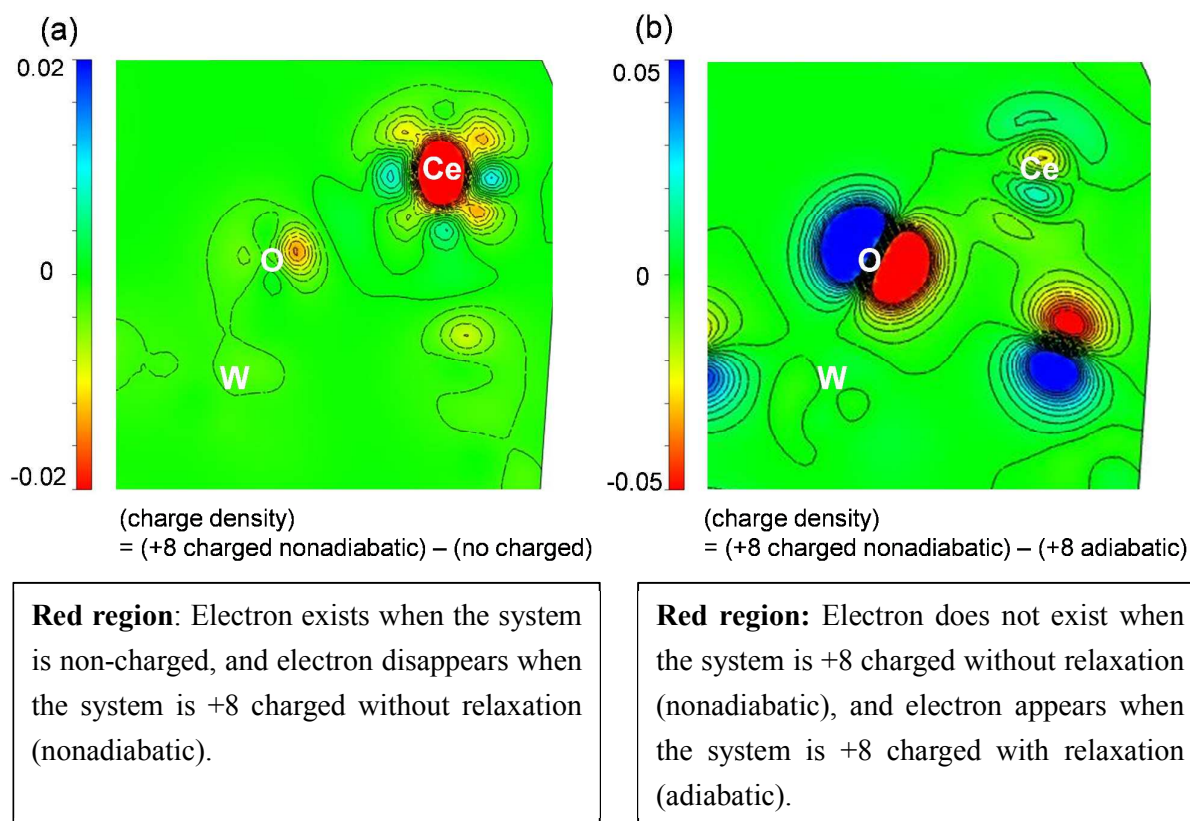

**Figure S15.** Charge density difference plots of  $\text{Ce}_2(\text{WO}_4)_3$  around O2: (a) (+8 charged without structural relaxation) – (neutral), (b) (+8 charged without structural relaxation) – (+8 with structural relaxation).

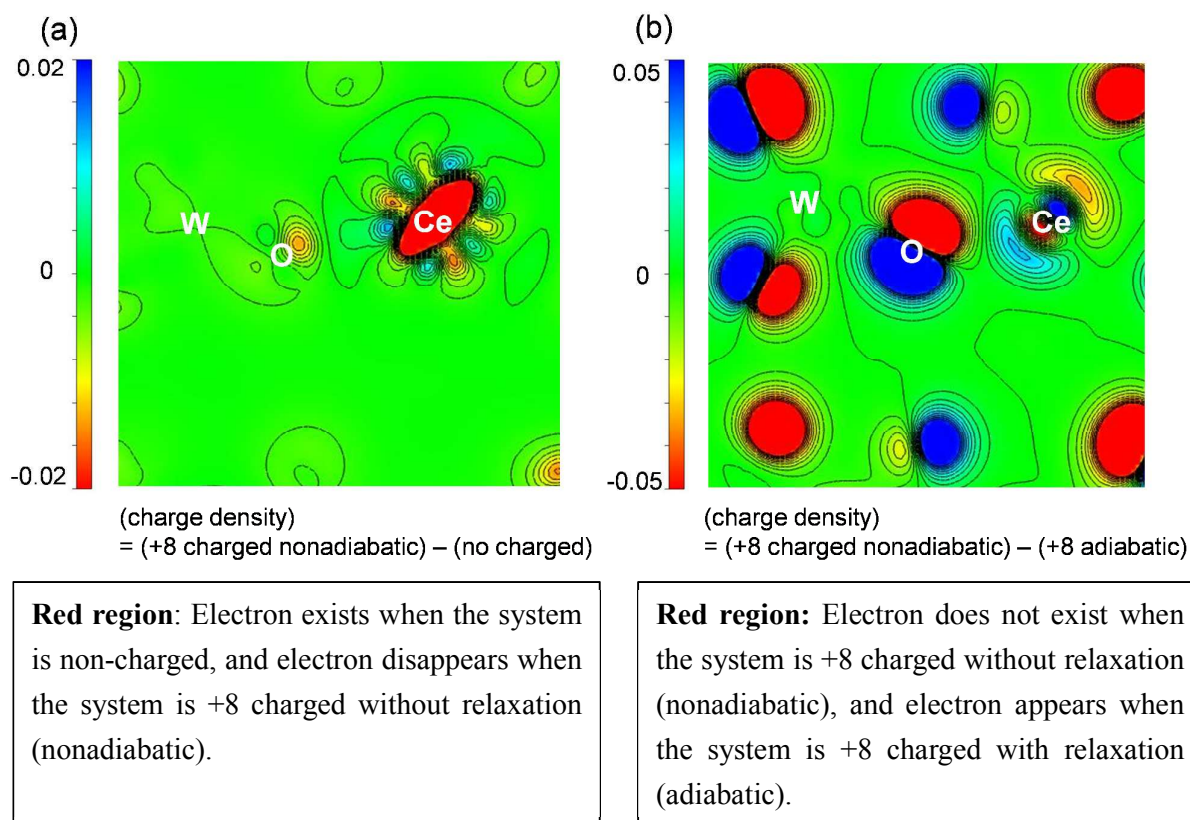

**Figure S16.** Charge density difference plots of  $\text{Ce}_2(\text{WO}_4)_3$  around O4: (a) (+8 charged without structural relaxation) – (neutral), (b) (+8 charged without structural relaxation) – (+8 with structural relaxation).



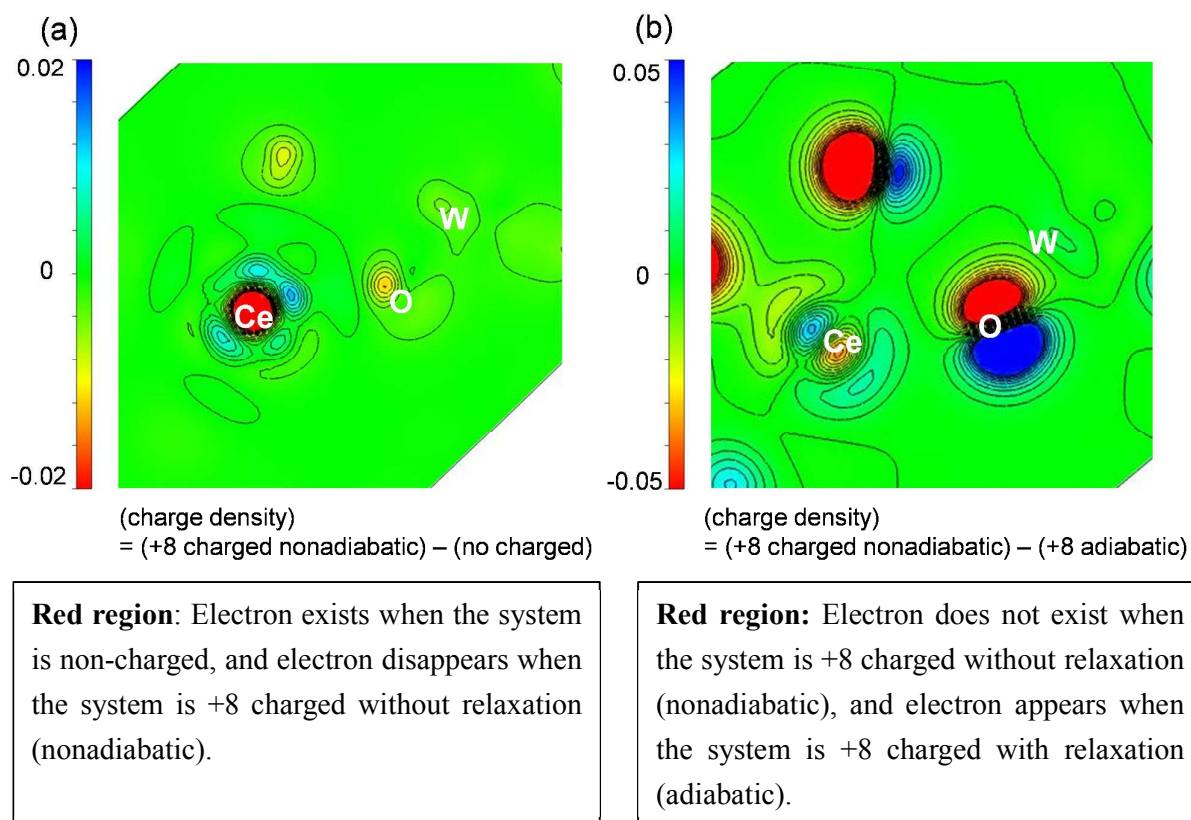

**Figure S17.** Charge density difference plots of  $\text{Ce}_2(\text{WO}_4)_3$  around O5: (a) (+8 charged without structural relaxation) – (neutral), (b) (+8 charged without structural relaxation) – (+8 with structural relaxation).

## References

- (1) Arab, M.; Lopes-Moriyama, L.; dos Santos, T. R.; de Souza, C. P.; Gavarri, J. R.; Leroux, C. Strontium and Cerium Tungstate Materials  $\text{SrWO}_4$  and  $\text{Ce}_2(\text{WO}_4)_3$ : Methane Oxidation and Mixed Conduction. *Catal. Today*. **2013**, *208*, 35–41.
- (2) Lopes, F. W. B.; Arab, M.; Macedo, H. P.; de Souza, C. P.; de Souza, J. F.; Gavarri, J. R. High Temperature Conduction and Methane Conversion Capability of  $\text{BaCeO}_3$  Perovskite. *Powder Technol.* **2013**, *219*, 186–192.
- (3) Burcham, L. J.; Wachs, I. E. Vibrational Analysis of the Two Non-Equivalent, Tetrahedral Tungstate ( $\text{WO}_4$ ) Units in  $\text{Ce}_2(\text{WO}_4)_3$  and  $\text{La}_2(\text{WO}_4)_3$ . *Spectrochimica Acta A*. **1994**, *54*, 1355–1368.
- (4) Sugiura, K.; Ogo, S.; Iwasaki, K.; Yabe, T.; Sekine, Y. Low-Temperature Catalytic Oxidative Coupling of Methane in an Electric Field Over a Ce–W–O Catalyst System. *Sci. Rep.* **2016**, *6*, 25154.
- (5) Mamede, A.-S.; Payen, E.; Grange, P.; Poncelet, G.; Ion, A.; Alifanti, M.; Pârvulescu, V. I. Characterization of  $\text{WO}_x/\text{CeO}_2$  Catalysts and Their Reactivity in the Isomerization of Hexane. *J. Catal.* **2004**, *223*, 1–12.
- (6) Gressling, T.; Müller-Buschbaum, Hk. Zur Kristallstruktur von  $\text{Ce}_2(\text{WO}_4)_3$ . *Z. Naturforsch.* **1995**, *50b*, 1513–1516 (written in German).
- (7) Sun, B.; Li, X.; Liang, D.; Chen, P. Effect of Visible-Light Illumination on Resistive Switching Characteristics in  $\text{Ag}/\text{Ce}_2\text{W}_3\text{O}_{12}/\text{FTO}$  Devices. *Chem. Phys. Lett.* **2016**, *643*, 66–70.
- (8) Gärtner, M.; Abeln, D.; Pring, A.; Wilde, M.; Reller, A. Synthesis, Structure, and Reactivity of Novel Lanthanum Tungstates. *J. Solid State Chem.* **1994**, *111*, 128–133.
